# Supplementary material for: Three-dimensional hyaluronic acid hydrogel-based models for in vitro human iPSC-derived NPC culture and differentiation
Source: Royal Society of Chemistry journal article supplement (doi:10.1039/c7tb00721c), 2017-01-01
Supplement: c7tb00721c1.pdf [file c7tb00721c1.pdf]

## Supplementary Information

### Three-Dimensional Hyaluronic Acid Hydrogel-Based Models for In Vitro Human iPSC-Derived NPC Culture and Differentiation

Shaohua Wu,<sup>ab</sup> Ranjie Xu,<sup>ad</sup> Bin Duan<sup>\*abc</sup> and Peng Jiang<sup>\*ad</sup>

<sup>a</sup>Mary & Dick Holland Regenerative Medicine Program, University of Nebraska Medical Center, Omaha, NE, USA

<sup>b</sup>Division of Cardiology, Department of Internal Medicine, University of Nebraska Medical Center, Omaha, NE, USA

<sup>c</sup>Department of Surgery, College of Medicine, University of Nebraska Medical Center, Omaha, NE, USA

<sup>d</sup>Department of Developmental Neuroscience, Munroe-Meyer Institute, University of Nebraska Medical Center, Omaha, NE, USA

**Correspondence should be addressed to either Dr. Bin Duan ([bin.duan@unmc.edu](mailto:bin.duan@unmc.edu)) or Dr. Peng Jiang ([peng.jiang@unmc.edu](mailto:peng.jiang@unmc.edu)).**

\*Corresponding author

Dr. Bin Duan, [bin.duan@unmc.edu](mailto:bin.duan@unmc.edu); Phone: +1-(402) 559-9637

Dr. Peng Jiang, [peng.jiang@unmc.edu](mailto:peng.jiang@unmc.edu); Phone: +1-(402) 559-9187

This file includes:

Supplemental Table (1)

### Supplemental Table S1 qPCR Primers

|            | Genbank ID     | Primer sequences (5'→3')                                 | Product size (bp) |
|------------|----------------|----------------------------------------------------------|-------------------|
| 18S        | NR_003286      | F: GAGAAACGGCTACCACATCC<br>R: CACCAGACTTGCCCTCCA         | 170               |
| Nestin     | NM_006617.1    | F: GTCCTCAGGGGAGGACTAGG<br>R: GCCTCTCAGCCAGAAACCAT       | 151               |
| Sox2       | NM_003106.3    | F: GGATAAGTACACGCTGCCCCG<br>R: ATGTGCGCGTAACTGTCCAT      | 123               |
| TUBB3      | NM_006086.3    | F: ACATCAGCCGATGCGAAG<br>R: TGTGCACGATCTCCCTCATA         | 141               |
| MAP2       | NM_002374.3    | F: GTAGTCACTGCTGAGGCTGT<br>R: TGACAGTCTGTTCTGAGGCA       | 154               |
| MBP        | NM_001025081.1 | F: ACATCAGCCGATGCGAAG<br>R: TGTGCACGATCTCCCTCATA         | 174               |
| S100B      | NM_006272.2    | F: TGTAGACCCTAACCCGGAGG<br>R: TGCATGGATGAGGAACGCAT       | 144               |
| Synapsin I | NM_006950.3    | F: CCAGTCTCTGACCAATGCCT<br>R: GGGGTTCTCAGAGTGGGGTA       | 150               |
| DLG4       | NM_001365.4    | F: CCTGGACTATTATGAGGCTTCCC<br>R: TGCAACTCATATCCTGGGGCTTC | 165               |
